# Supplementary material for: Reactions of coordinated geminal dichromium reagents with aldehydes: stereoselective formation of (Z)-2-chloroalk-2-en-1-ols
Source: Royal Society of Chemistry journal article supplement (doi:10.1039/b102387j), 2001-01-01
Supplement: b102387j.doc [file b102387j.doc]

**Electronic Supplementary Information**

Reactions of Coordinated Geminal Dichromium Reagents with Aldehydes: Stereoselective Formation of (*Z*)-2-Chloro-2-alken-1-ols

Kazuhiko Takai,* Ryo Kokumai and Takahumi Nobunaka

***Typical experimental procedure*** (run 1 in Table 2): To a mixture of CrCl2 (0.98 g, 8.0 mmol) in dry, oxygen-free THF (16 mL) was added DMF (0.61 mL, 8.0 mmol) and stirred at 25 °C for 30 min. The suspension was cooled to –10 °C, and a solution of nonanal (0.14 g, 1.0 mmol) in THF (2 mL) and a solution of trichloride **1e** (0.62 g, 2.0 mmol)1 in THF (2 mL) were added slowly to the suspension, successively. The resulting mixture was stirred at –10 °C for 24 h and poured into water (10 mL). This mixture was extracted with ether (3x10 mL), and the organic extracts were dried over anhydrous magnesium sulfate and concentrated. Purification by column chromatography on silica gel (hexane-ethyl acetate, 50/1) gave 4-chloro-1-phenyl-3-tridecen-5-ol (**2**) in 84% yield (0.26 g, 0.84 mmol) as a colorless oil: bp 120 °C (bath temp, 0.15 Torr); IR (neat) 3366, 3027, 2925, 2855, 1656, 1604, 1496, 1454, 1378, 1076, 1055, 1031, 907, 850, 747, 698, cm-1; 1H NMR (CDCl3):  0.88 (t, *J* = 6.9 Hz, 3H), 1.21-1.34 (m, 12H), 1.26-1.65 (m, 2H), 1.79 (s, 1H), 2.53 (dq, *J* = 1.6, 6.9 Hz, 2H), 2.73 (dt, *J* = 1.8, 7.2 Hz, 2H), 4.11 (t, *J* = 6.7 Hz, 1H), 5.76 (t, *J* = 7.0 Hz, 1H), 7.19-7.31 (m, 5H); 13C NMR (CDCl3):  14.1, 22.7, 25.3, 29.2, 29.4, 29.5, 29.7 31.8, 34.5, 34.9, 76.0, 126.1, 128.4, 137.2, 141.2. Found: M (HRMS), 308.1895. Calc. for C19H29ClO: *M*, 308.1907.

1 The starting 2-alkoxy-substituted 1,1,1-trichloroalkanes were prepared according to the following literature. E. J. Corey, J. O. Link and Y. Shao, *Tetrahedron Lett.*, 1992, **33**, 3435. See also, T. Shono, N. Kise and T. Suzumoto, *J. Am. Chem. Soc.*, 1984, **106**, 259; T. Mukaiyama, M. Yamaguchi and J.-i. Kato, *Chem. Lett.*, 1981, 1505.
